# Supplementary material for: Rapid dissolution of cellulose in an AlCl3/ZnCl2 aqueous system at room temperature and its versatile adaptability in functional materials
Source: Royal Society of Chemistry journal article supplement (doi:10.1039/d1gc03918k), 2021-12-14
Supplement: d1gc03918k1.pdf [file d1gc03918k1.pdf]

1  
2 **Supplementary information**

3  
4 **Rapid dissolution of cellulose in  $\text{AlCl}_3/\text{ZnCl}_2$  aqueous system at room**  
5 **temperature and its versatile adaptability in functional materials**

6 Yue Xi<sup>†</sup>, Lili Zhang<sup>†</sup>, Yahui Tian, Junlong Song, Jinxia Ma<sup>\*</sup>, and Zhiguo Wang<sup>\*</sup>

7

---

## 8 Table of Contents

9 **Table S 1.** The cost of solvents and energy in the process of dissolving one gram of cellulose in

10  $\text{AlCl}_3/\text{ZnCl}_2$  ( $\text{Al}^{3+}:\text{Zn}^{2+}=1:9$ ) aqueous system.

11 **Fig. S1.** Tensile stress-strain curves of the cellophane and RCF from  $\text{ZnCl}_2 \cdot 4\text{H}_2\text{O}$  and  $\text{AlCl}_3/\text{ZnCl}_2 \cdot 4\text{H}_2\text{O}$

12 solutions.

13 **Fig. S2.** (a)The experimental HRTEM image and (b) Energy dispersive X-ray spectrum (EDS) and XRD

14 pattern(c) of Al-ZnO RCF.

15 **Fig. S3.** Tensile strength of Al-ZnO RCF before and after photocatalysis under UV irradiation.

16 **Table S2.** Crystallinity of cellulose before and after regeneration

17 **Table S 1.** The cost of solvents and energy in the process of dissolving one gram of cellulose in  $\text{AlCl}_3/\text{ZnCl}_2$  ( $\text{Al}^{3+}:\text{Zn}^{2+}=1:9$ )  
18 aqueous system.

| Chemical agent                     | $\text{AlCl}_3 \cdot 6\text{H}_2\text{O}$ | $\text{ZnCl}_2$ |
|------------------------------------|-------------------------------------------|-----------------|
| Price (\$/kg)                      | 10.32                                     | 25.65           |
| Dosage (g)                         | 1.21                                      | 6.12            |
| Solvent cost (\$/g)                | 0.0125                                    | 0.1570          |
| 5% dosage consumption (\$/g)       | 0.0006                                    | 0.0079          |
| 10 times dosage consumption (\$/g) | 0.0045                                    | 0.0560          |

19  
20

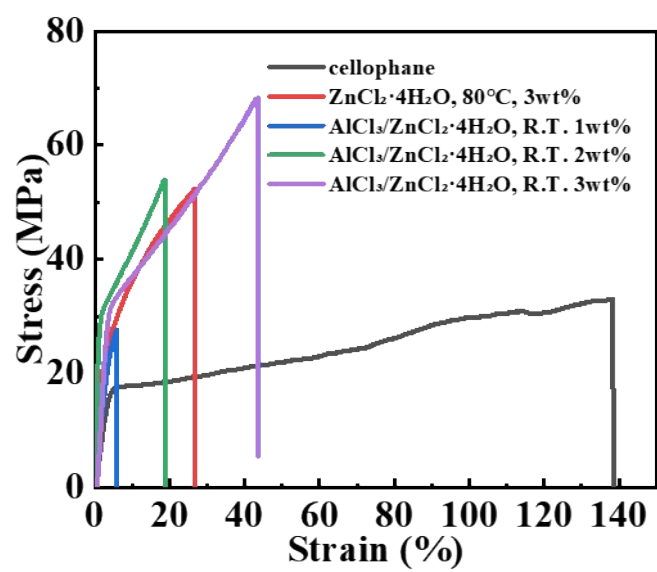

21  
22 **Fig. S1.** Tensile stress-strain curves of the cellophane and RCF from ZnCl<sub>2</sub>·4H<sub>2</sub>O and AlCl<sub>3</sub>/ZnCl<sub>2</sub>·4H<sub>2</sub>O solutions.

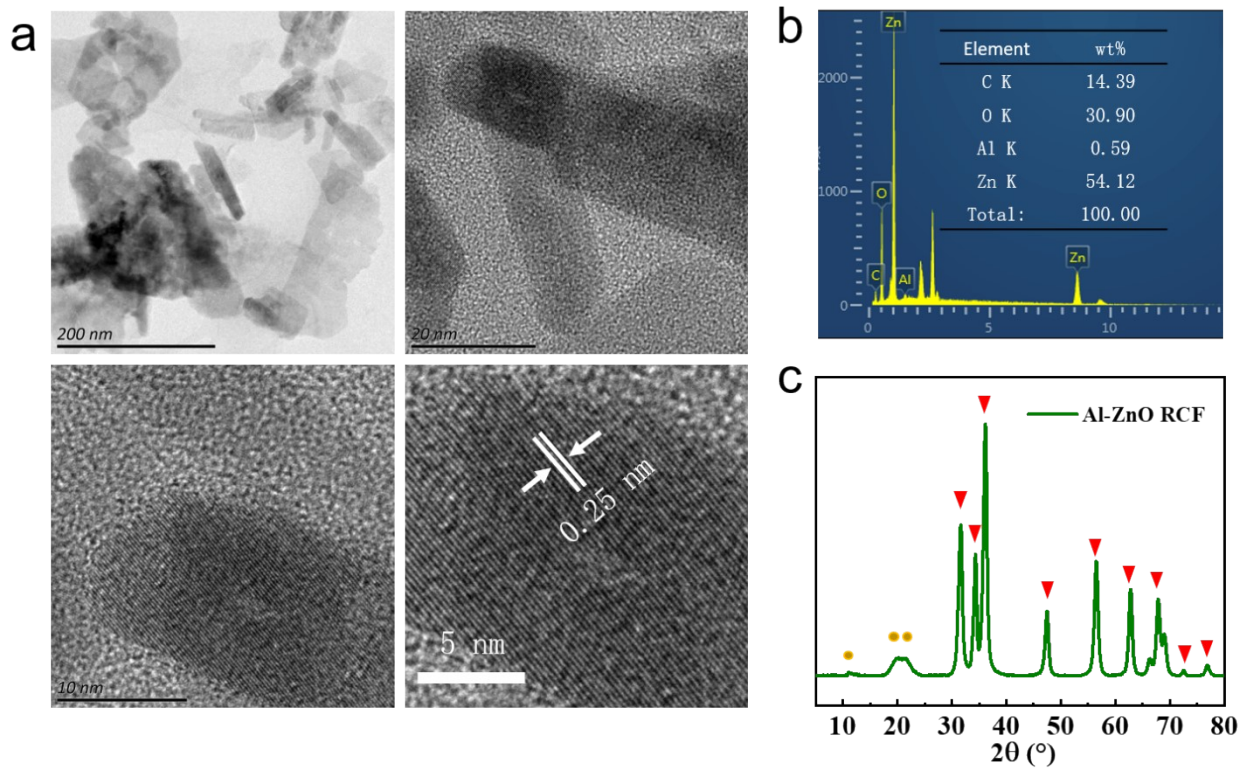

24  
25 **Fig. S2.** (a) The experimental HRTEM image, (b) Energy dispersive X-ray spectrum (EDS), and (c) XRD pattern of Al-ZnO RCF.

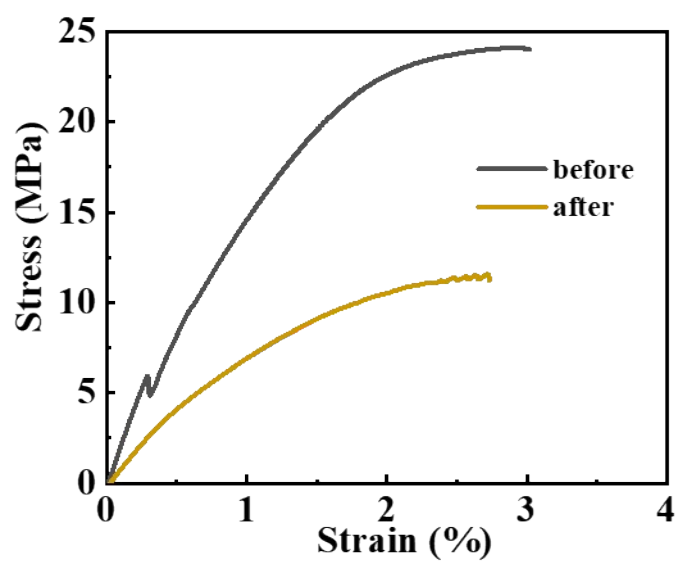

26  
27 **Fig. S3.** Tensile strength of Al-ZnO RCF before and after photocatalysis under UV irradiation.

28 **Table S2.** Crystallinity of cellulose before and after regeneration

| Crystalline | Position of characteristic peak |       |       | Crystallinity (%) |
|-------------|---------------------------------|-------|-------|-------------------|
|             | 1-10                            | 100   | 200   |                   |
| 500CF I     | 14.74                           | 16.16 | 22.3  | 74.84%            |
| 2000CF I    | 14.64                           | 16.38 | 22.56 | 67.84%            |

  

| Crystalline | Position of characteristic peak |       |       | Crystallinity (%) |
|-------------|---------------------------------|-------|-------|-------------------|
|             | 1-10                            | 100   | 020   |                   |
| 500RCF II   | 12.42                           | 20.56 | 22.02 | 53.41%            |
| 2000RCF II  | 12.16                           | 19.84 | 21.46 | 37.96%            |

29  
30  
31
